# Supplementary material for: Mechanism of extracellular space changes in cryptococcal brain granuloma revealed by MRI tracer
Source: Frontiers journal article supplement (doi:10.3389/fnins.2022.1034091), 2022-12-20
Supplement: Data_Sheet_1.DOCX [file Data_Sheet_1.DOCX]

| **Group Statistics** | | | | | |
| --- | --- | --- | --- | --- | --- |
|  | Group | N | Mean | Std. Deviation | Std. Error Mean |
| D | control | 6 | 3.1950 | .17003 | .06941 |
| interior | 6 | 3.4483 | .14689 | .05997 |
| edge | 5 | 2.6402 | .12433 | .05560 |
| α | control | 6 | 16.9783 | .17543 | .07162 |
| interior | 6 | 17.3250 | .14707 | .06004 |
| edge | 5 | 16.5075 | .12736 | .05696 |
| k | control | 6 | 3.0850 | .81775 | .33384 |
| interior | 6 | 4.3267 | .52110 | .21274 |
| edge | 5 | 3.9470 | 2.39402 | 1.07064 |
| λ | control | 6 | 1.8233 | .04926 | .02011 |
| interior | 6 | 1.7550 | .03782 | .01544 |
| edge | 5 | 2.0051 | .04694 | .02099 |
| T1/2 | control | 6 | 97.3267 | 13.39106 | 5.46688 |
| interior | 6 | 312.6550 | 136.82340 | 55.85792 |
| edge | 5 | 188.1241 | 114.67075 | 51.28232 |

**Independent Samples Test (interior vs control)**

|  | t | Sig. (2-tailed) | Mean Difference | Std. Error Difference | 95% Confidence Interval of the Difference | |
| --- | --- | --- | --- | --- | --- | --- |
| Lower | Upper |
| D | 2.762 | .020 | .25333 | .09173 | .04895 | .45772 |
| α | 3.709 | .004 | .34667 | .09346 | .13843 | .55490 |
| k | 3.137 | .011 | 1.24167 | .39587 | .35962 | 2.12371 |
| λ | -2.695 | .022 | -.06833 | .02535 | -.12482 | -.01184 |
| T1/2 | 3.837 | .012 | 215.32833 | 56.12481 | 71.86674 | 358.78992 |

|  | t | Sig. (2-tailed) | Mean Difference | Std. Error Difference | 95% Confidence Interval of the Difference | |
| --- | --- | --- | --- | --- | --- | --- |
| Lower | Upper |
| D | -6.050 | .000 | -.55478 | .09170 | -.76221 | -.34735 |
| α | -4.988 | .001 | -.47085 | .09441 | -.68441 | -.25729 |
| k | .769 | .478 | .86204 | 1.12148 | -2.06129 | 3.78537 |
| λ | 6.222 | .000 | .18177 | .02921 | .11568 | .24785 |
| T1/2 | 1.761 | .152 | 90.79741 | 51.57289 | -51.14433 | 232.73916 |

**Independent Samples Test (edge vs control)**
